# Supplementary material
Source: PubMed Central journal article supplement (PMC218723)

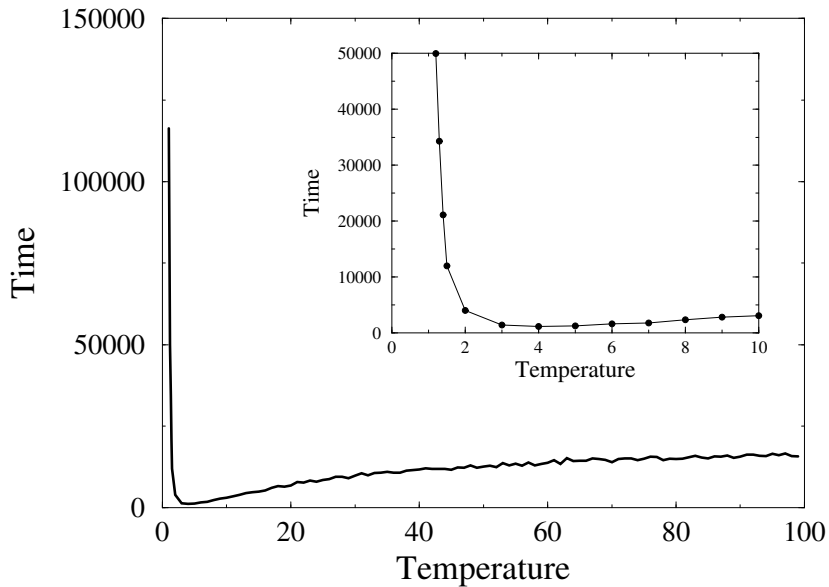

Supplement: pnas_2032324100_3.pdf [file pnas_2032324100_3.pdf]

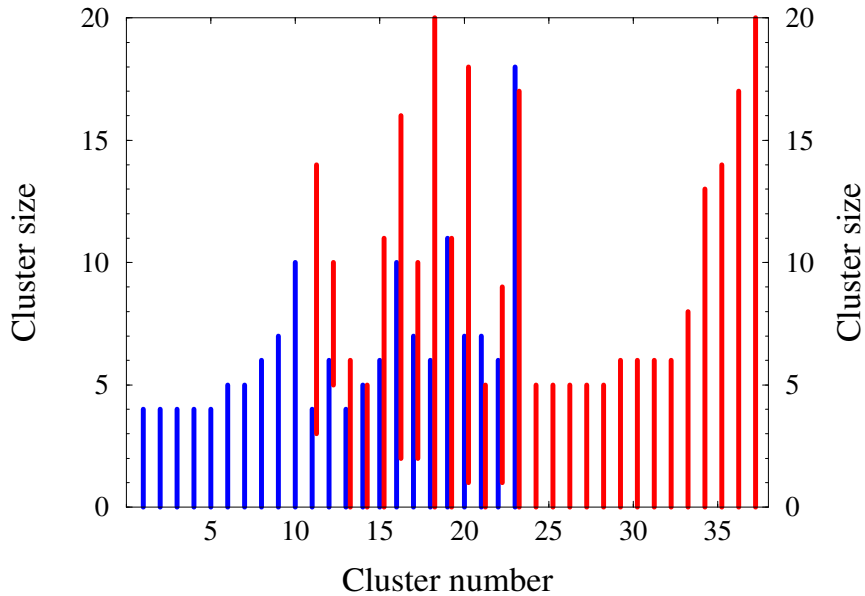

Supplement: pnas_2032324100_5.pdf [file pnas_2032324100_5.pdf]

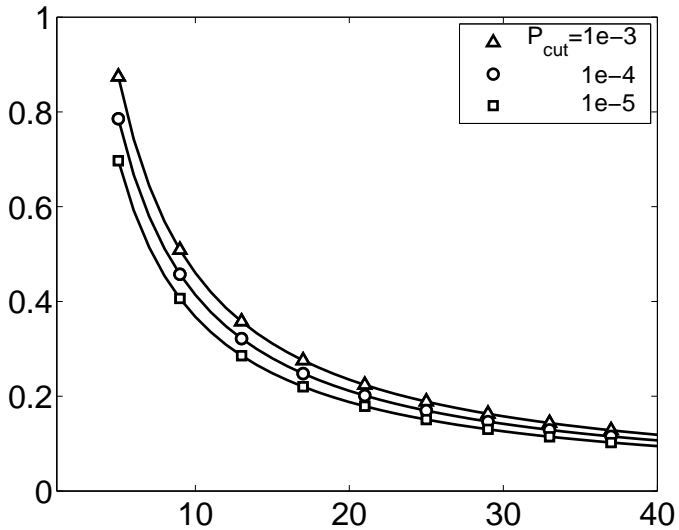

Supplement: pnas_2032324100_7.pdf [file pnas_2032324100_7.pdf]

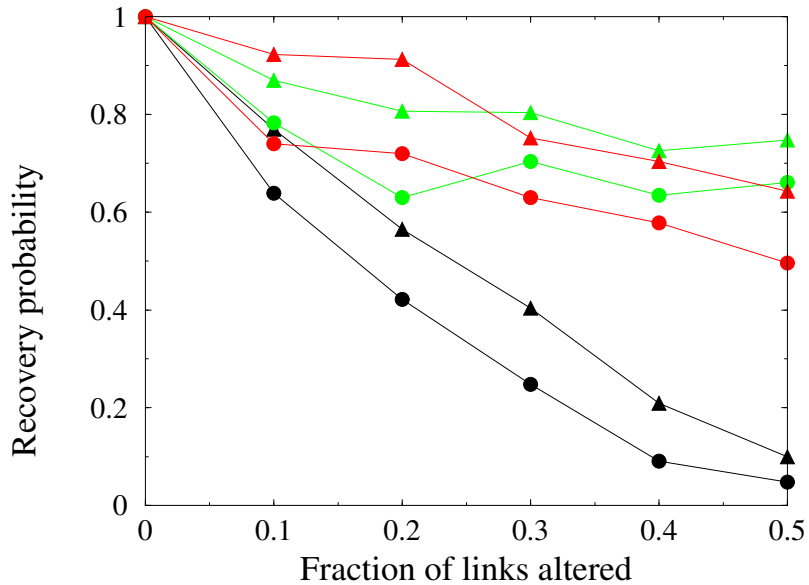

Supplement: pnas_2032324100_9.pdf [file pnas_2032324100_9.pdf]
